# Supplementary material
Source: PubMed Central journal article supplement (PMC4014119)
Supplement: d-70-01233-sup2.pdf [file d-70-01233-sup2.pdf]

## Supporting Information

**Table S1.** Real space correlation coefficients for ligands involved in the region QM refinement.

| PDB         | LIG ID     | Year        | Resolution | CC<br>Original | CC<br>QM Refined |
|-------------|------------|-------------|------------|----------------|------------------|
| low         |            |             |            |                |                  |
| 3IX1        | NFM        | 2009        | 2.4        | 0.82           | 0.84             |
| 2VTS        | LZC        | 2008        | 1.9        | 0.87           | 0.86             |
| 2YHD        | TES        | 2011        | 2.2        | 0.91           | 0.92             |
| 3QYI        | PG4        | 2011        | 2.18       | 0.75           | 0.76             |
| 3NC9        | TR3        | 2010        | 2.4        | 0.90           | 0.92             |
| 3BEA        | IXH        | 2007        | 2.02       | 0.91           | 0.91             |
| 3RDP        | NMF        | 2011        | 2.8        | 0.82           | 0.82             |
| 3SUV        | NOK        | 2011        | 1.6        | 0.83           | 0.83             |
| 2VWW        | 7X2        | 2008        | 1.9        | 0.78           | 0.91             |
| 2Q3Y        | 1CA        | 2007        | 2.4        | 0.89           | 0.89             |
| medium      |            |             |            |                |                  |
| 3NYX        | TZ1        | 2010        | 2.5        | 0.90           | 0.91             |
| 3VKJ        | FNR        | 2011        | 1.7        | 0.88           | 0.88             |
| 3R22        | D37        | 2011        | 2.9        | 0.89           | 0.89             |
| 3O50        | LJE        | 2010        | 2.0        | 0.87           | 0.88             |
| 4DQC        | 017        | 2012        | 1.94       | 0.86           | 0.85             |
| 3L5E        | BDW        | 2009        | 1.53       | 0.87           | 0.89             |
| 2XK4        | OL2        | 2010        | 2.1        | 0.88           | 0.88             |
| 3OTU        | BI4        | 2010        | 2.1        | 0.89           | 0.89             |
| 3GUS        | N11        | 2009        | 1.53       | 0.75           | 0.76             |
| 3OWJ        | 1EL        | 2010        | 1.85       | 0.83           | 0.84             |
| high        |            |             |            |                |                  |
| <b>2ZL9</b> | <b>VDA</b> | <b>2008</b> | <b>1.9</b> | <b>0.88</b>    | <b>0.88</b>      |
| 2Y68        | T04        | 2011        | 1.49       | 0.86           | 0.87             |

|             |            |             |            |             |             |
|-------------|------------|-------------|------------|-------------|-------------|
| 3II4        | 3II        | 2009        | 2.42       | 0.84        | 0.88        |
| 3H2O        | B63        | 2009        | 2.7        | 0.80        | 0.81        |
| 3V7Y        | A3N        | 2011        | 1.97       | 0.82        | 0.82        |
| 3DRR        | R8E        | 2008        | 2.89       | 0.09        | 0.12        |
| <b>2WUE</b> | <b>KEK</b> | <b>2009</b> | <b>1.8</b> | <b>0.59</b> | <b>0.59</b> |
| 2XNP        | WCX        | 2010        | 1.98       | 0.92        | 0.93        |
| 3FE9        | CMJ        | 2008        | 1.75       | 0.84        | 0.85        |
| 2OGA        | PGU        | 2007        | 2.05       | 0.85        | 0.86        |

---

metal

---

|             |                |             |             |             |             |
|-------------|----------------|-------------|-------------|-------------|-------------|
| 2OF1        | THP: Ca        | 2007        | 1.92        | 0.90        | 0.90        |
| 3OVS        | CTP: Ca        | 2010        | 2.8         | 0.86        | 0.86        |
| 3MTW        | M3R: Zn        | 2010        | 1.7         | 0.87        | 0.88        |
| 3SPZ        | UPC: Ca        | 2011        | 2.43        | 0.82        | 0.82        |
| 2WO9        | 68: Zn         | 2009        | 1.7         | 0.64        | 0.64        |
| 3OIM        | VZ5: Zn        | 2010        | 1.45        | 0.59        | 0.60        |
| 2PJC        | 343: Zn        | 2007        | 1.74        | 0.76        | 0.78        |
| 3ZYF        | 147: Ca        | 2011        | 1.94        | 0.75        | 0.76        |
| <b>2X7T</b> | <b>WZB: Zn</b> | <b>2010</b> | <b>1.89</b> | <b>0.65</b> | <b>0.65</b> |
| 3QIY        | QI1: Zn        | 2011        | 2.3         | 0.46        | 0.46        |

---

bound

---

|             |            |             |            |             |             |
|-------------|------------|-------------|------------|-------------|-------------|
| <b>3NCK</b> | <b>NFF</b> | <b>2010</b> | <b>2.8</b> | <b>0.80</b> | <b>0.82</b> |
| 3UME        | HC4        | 2011        | 1.8        | 0.72        | 0.72        |
| 3LXS        | 4MC        | 2010        | 1.5        | 0.82        | 0.82        |
| 2WZZ        | ZX1        | 2009        | 1.57       | 0.83        | 0.83        |
| 2WJ1        | S99        | 2009        | 1.84       | 0.81        | 0.81        |
| 3FA6        | LSR        | 2008        | 1.54       | 0.83        | 0.83        |
| 2UZJ        | E64        | 2008        | 1.55       | 0.62        | 0.62        |
| 2VK7        | FSI        | 2007        | 1.2        | 0.81        | 0.81        |
| 2V6N        | XP1        | 2007        | 1.98       | 0.72        | 0.73        |
| 3IXH        | PCZ        | 2009        | 2.3        | 0.77        | 0.77        |

---
